# Supplementary material for: Changes in Fat Mass Following Creatine Supplementation and Resistance Training in Adults ≥50 Years of Age: A Meta-Analysis
Source: J Funct Morphol Kinesiol. 2019 Aug 23;4(3):62. doi: 10.3390/jfmk4030062 (PMC7739317; doi:10.3390/jfmk4030062)
Supplement: Supplementary file 1 [file jfmk-04-00062-s001.pdf]

Table S1: Individual study characteristics.

| First Author, Year     | Population                                                            | Supplement Dose                                        | Resistance Training and Duration    | Training Volume                                        | Dietary Intake                                                    | Body Composition Tool            | Outcomes                                                                                                                          |
|------------------------|-----------------------------------------------------------------------|--------------------------------------------------------|-------------------------------------|--------------------------------------------------------|-------------------------------------------------------------------|----------------------------------|-----------------------------------------------------------------------------------------------------------------------------------|
| Anguiar et al., 2013   | N=18; healthy women; Mean age=65 years                                | CR (5g/day) or PLA                                     | RT = 3 days/wk; 12 weeks            | CR ↑ training volume compared to placebo               | ↔ % CHO, % Protein, %Fat before or after the training.            | DEXA                             | CR ↑ gains in fat-free mass (+3.2%) ↔ on body mass, fat mass, and % body fat over time or between groups.                         |
| Bermon et al., 1998    | N=32 (16 men, 16 women); healthy; age=67-80 years                     | CR (20g/day for 5 days followed by 3 g/day) or PLA     | T = 3 days/wk; ~7.4 weeks (52 days) | Not Reported                                           | Only reported as normal (mini nutritional assessment).            | Skinfold Thickness.              | ↔ body mass, body fat over time or between groups.                                                                                |
| Brose et al., 2003     | N=28 (15 men, 13 women); healthy; age: men = 68.7, women = 70.8 years | CR (5g/day) or PLA                                     | RT = 3 days/wk; 14 weeks            | Not Reported                                           | ↔ for energy intake or macronutrient over time or between groups. | DEXA                             | CR ↑ gains in lean tissue mass and total body mass ↔ in % body fat or fat mass over time or between groups.                       |
| Candow et al., 2008    | N=35; healthy men; age=59-77 years                                    | CR (0.1g/kg/day) or CR+protein (0.3g/kg/day) or PLA    | RT = 3 days/wk; 10 weeks            | ↔ on training volume between groups.                   | ↔ for energy intake or macronutrient over time or between groups. | Air-displacement plethysmography | CR and CR+protein conditions combined ↑muscle thickness compared to PLA. CR ↑body mass compared to PLA. ↔ % body fat or fat mass. |
| Candow et al., 2015    | N=39 (17 men, 22 women); healthy; age = 50-71 years                   | CR (0.1g/kg) before RT, CR (0.1 g/kg) after RT, or PLA | RT = 3 days/wk; 32 weeks            | ↔ on training volume between groups.                   | ↑ energy intake over time; ↔ between groups.                      | DEXA                             | Cr After ↑ lean tissue mass compared to PLA. ↔ Fat mass between groups (sig. decrease over time: main effect).                    |
| Chilibeck et al., 2015 | N=33; healthy women; Mean age=57 years                                | CR (0.1g/kg/day) or PLA                                | RT=3 days/wk; 52 weeks              | ↔ on training volume between groups. Sig. time effect. | ↔ Energy between groups or over time.                             | DEXA                             | ↔ lean tissue mass, body mass, fat mass, or percent body fat.                                                                     |

|                      |                                                       |                                                            |                                                |                                                               |                                                  |                         |                                                                                                                         |
|----------------------|-------------------------------------------------------|------------------------------------------------------------|------------------------------------------------|---------------------------------------------------------------|--------------------------------------------------|-------------------------|-------------------------------------------------------------------------------------------------------------------------|
| Chrusch et al., 2001 | N=30; healthy men; age=60-84 years                    | CR (0.3g/kg/d for 5 days followed by 0.07 g/kg/day) or PLA | RT = 3 days/wk; 12 weeks                       | CR ↑ training volume (31% greater) than placebo.              | Not Reported                                     | DEXA                    | CR ↑ gains in lean tissue mass and body mass ↔ % body fat or fat mass over time or between groups.                      |
| Collins et al., 2016 | N=16 (frail men and women); age=70 years              | CR (4 g/day) and protein (20g/day) or protein              | RT = 2 days/wk; 14 weeks                       | Not Reported                                                  | ↔ energy or protein between groups (time effect) | DEXA                    | ↔ body mass, fat-free mass, or fat mass.                                                                                |
| Cooke et al., 2014   | N=20; healthy men; age=55-70 years                    | CR (20g/day for 7 days than 0.1 g/kg/day on training days) | RT = 3 days/wk; 12 weeks                       | ↔ in training volume between groups. ↑ main effect over time. | ↔ energy or protein between groups (time effect) | DEXA                    | ↔ body mass, lean tissue mass. CR ↓ (trend) % body fat and absolute fat mass.                                           |
| Deacon et al., 2008  | N=80 (50 men, 30 women); COPD; age=68.2 years         | CR (22g/day for 5 day followed by 3.76g/day) or PLA        | RT = 3 days/wk; 7 weeks                        | Not Reported                                                  | Not Reported                                     | Bioelectrical impedance | ↔ lean tissue mass or body mass between groups (both sig. increased over time). ↔ fat mass over time or between groups. |
| Eijnde et al., 2003  | N=46; healthy men; age=55-75 years                    | CR (5g/day) or PLA                                         | Cardiorespiratory + RT = 2-3 days/wk; 26 weeks | ↔ in training volume between groups.                          | Not Reported                                     | Hydrostatic Weighing    | ↔ body mass, % body fat, and fat-free mass compared to PLA.                                                             |
| Eliot et al., 2008   | N=42; healthy men; age=48-72 years                    | CR (5g/day), protein (35 g/day), CR+protein, or PLA        | RT = 3 days/wk; 14 weeks                       | Not Reported                                                  | ↔ Energy between groups.                         | DEXA                    | ↔ % body fat, total body fat, or body mass compared to PLA.                                                             |
| Gualano et al., 2011 | N=25 (9 men, 16 women); type 2 diabetes; age=57 years | CR (5 g/day) or PLA                                        | RT = 3 days/wk; 12 weeks                       | ↔ in training volume between groups.                          | ↔ Energy between groups.                         | DEXA                    | ↔ body mass, fat mass, or lean tissue mass                                                                              |

|                           |                                                                       |                                                                              |                          |                                      |                                                                                 |      |                                                                                                     |
|---------------------------|-----------------------------------------------------------------------|------------------------------------------------------------------------------|--------------------------|--------------------------------------|---------------------------------------------------------------------------------|------|-----------------------------------------------------------------------------------------------------|
| Gualano et al., 2014      | N=30; "vulnerable" women; Mean age=65.4 years                         | CR (20g/day for 5 days; 5 g/day thereafter) or PLA with and without RT       | RT=2 days/wk; 24 weeks   | Not Reported                         | ↔ Energy and macronutrient intake between groups.                               | DEXA | CR ↑ appendicular lean mass compared to PLA. ↔ Body mass or fat mass over time or between groups.   |
| Johannsmeyer et al., 2016 | N=31 (17 men, 14 women); healthy; age=58 years                        | CR (0.1g/kg/day) or PLA                                                      | RT = 3 days/wk; 12 weeks | ↔ in training volume between groups. | ↔ Energy and macronutrient intake between groups.                               | DEXA | CR ↑ body mass and lean tissue mass compared to PLA. ↓ body fat over time ↔ between groups.         |
| Neves et al., 2011        | N=24 (postmenopausal women with Knee osteoarthritis); Age=55-65 years | CR (20 g/day for 1 week, followed by 5 g/day) or PLA                         | RT=3 days/wk; 12 weeks   | Not Reported                         | ↔ Energy between groups or over time.                                           | DEXA | CR ↑ limb lean mass. ↔ body mass or % body fat. % body fat ↓ over time.                             |
| Pinto et al., 2016        | N=27 (men and women); healthy; age=60-80 years                        | CR (5 g/day) or PLA                                                          | RT = 3 days/wk; 12 weeks | Not Reported                         | ↔ Energy between groups or over time.                                           | DEXA | CR ↑ gains in body mass and lean tissue mass; CR ↓ body fat compared to PLA (p=0.053).              |
| Tarnopolsky et al, 2007   | N=39 (19 men, 20 women); healthy; age=65-85 years                     | CR (5 g/day) + CLA (6g/day) or PLA                                           | RT = 2 days/wk; 26 weeks | Not Reported                         | ↔ Energy between groups or over time. Men had greater energy intake than women. | DEXA | CR + CLA ↑ gains in lean tissue mass; CR + CLA ↓ fat mass compared to PLA; ↔ body mass or fat mass. |
| Villaneueva et al., 2014  | N=14; healthy men; age=68.7 years                                     | CR (0.3 g/kg/day for 5 days followed by 0.07 g/kg/day) + 35 g protein or PLA | RT = 3 days/wk; 12 weeks | Not Reported                         | ↔ Energy between groups.                                                        | DEXA | ↔ lean tissue mass, fat mass, or % body fat. CR + Protein ↓ % body fat compared to baseline.        |

---

RT = resistance training; CR = Creatine; PLA = Placebo; CLA = conjugated linoleic acid; DEXA = dual energy x-ray absorptiometry
